# Supplementary material for: Two in one: aluminum porphyrin-based porous organic polymers containing symmetrical quaternary phosphonium salts for catalytic conversion of CO2 into cyclic carbonates
Source: Royal Society of Chemistry journal article supplement (doi:10.1039/d3dt03627h), 2023-12-22

Supporting Information

**Two in One: Aluminum Porphyrin-Based Porous Organic Polymers Containing Symmetrical Quaternary Phosphonium Salts for Catalytic Conversion of CO<sub>2</sub> into Cyclic Carbonates**

*Kechi Chen, Yuanxiang Wu, Zixuan Zhang, Yiying Yang, Rongchang Luo<sup>\*a</sup>*

<sup>a</sup> School of Chemical Engineering and Light Industry, Guangdong University of Technology, Guangzhou 510006, China.

\* Corresponding author, E-mail: [luorch@gdut.edu.cn](mailto:luorch@gdut.edu.cn)

# 1. Methods

Fourier Transform infrared spectroscopy was carried out by Nicolet 6700 research-based infrared spectrometer with KBr wafers. The nuclear magnetic resonance investigations were collected by a Bruker Avance III 400 spectrometer. Solid-state  $^{13}\text{C}$  NMR and  $^{31}\text{P}$  NMR spectroscopy were recorded using an Bruker Avance III 600 spectrometer. X-ray photoelectron spectroscopy was conducted on a Thermo Scientific Escalab 250Xi spectrometer. Field emission transmission electron microscopy and element distribution energy spectrum were tested on a Thermo Scientific Talos F200S TEM. Thermogravimetric analysis was performed by STA449F5 thermogravimetric analyzer. The nitrogen adsorption isotherms and  $\text{CO}_2$  sorption properties were measured on the Micromeritics ASAP2020 automatic physical adsorption instrument. Metal content was determined by inductively coupled plasma mass spectrometer ICAP RQ (Thermo Fisher) by inductively coupled plasma mass spectrometry. Ion chromatography was used to measure the content of halogen ions by ion chromatograph Thermo Scientific ICS100. The yields and selectivities of the products were measured by a PANNA-A60 gas chromatograph. The chemical structures of the products were determined by  $^1\text{H}$  NMR and  $^{13}\text{C}$  NMR spectra.

## 2. Synthesis of AlPor-CMP and QP-PAF

AlPor-CMP and QP-PAF were synthesized by adopting the same method as described for AlPor-QP@POP, in which was prepared by treating AlPor (400 mg, 0.4 mmol) or QP (300 mg, 0.4 mmol) under identical conditions, respectively.

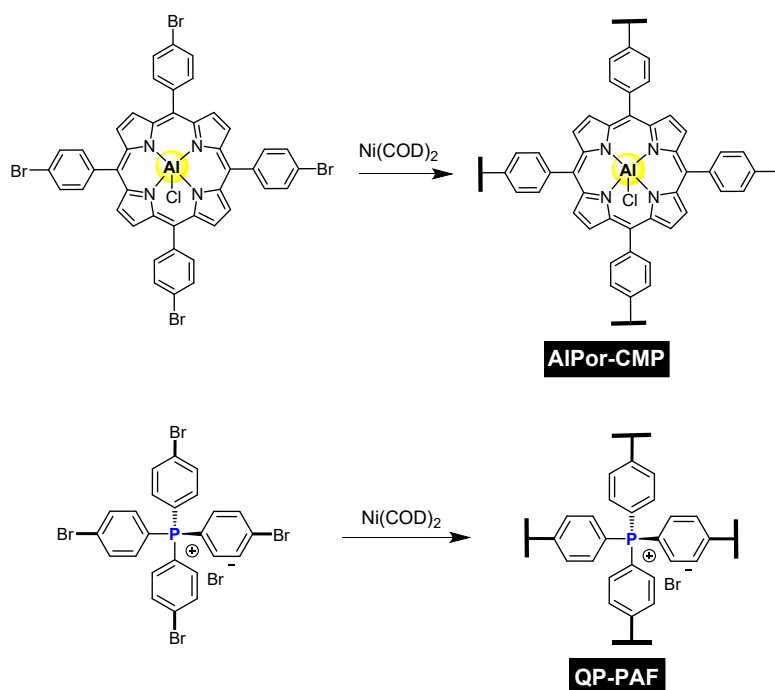

### 3. Figures

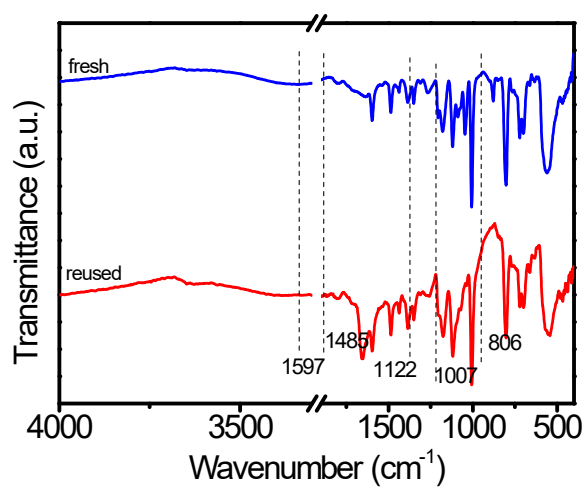

**Figure S1.** FT-IR spectrum of fresh and reused AlPor-QP@POP.

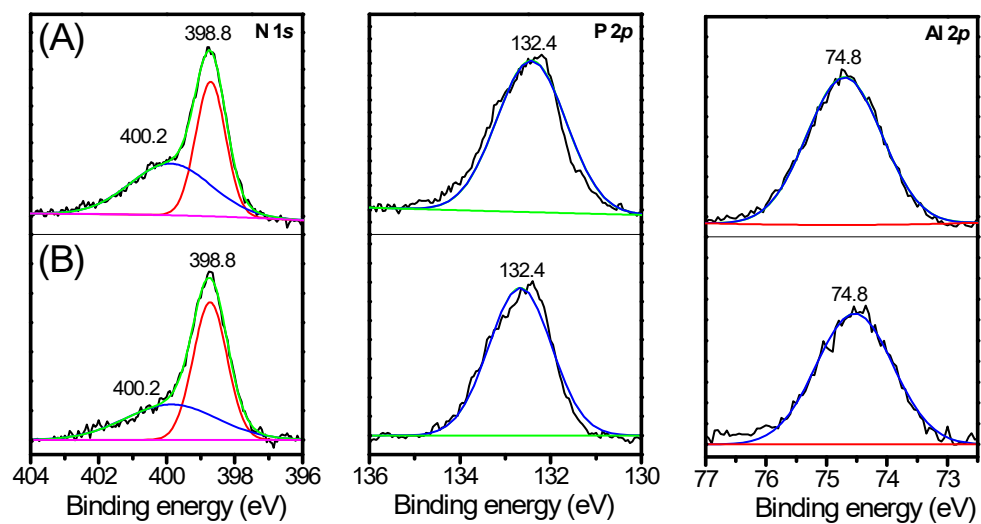

**Figure S2.** XPS spectra of (A) fresh and (B) reused AIPor-QP@POP.

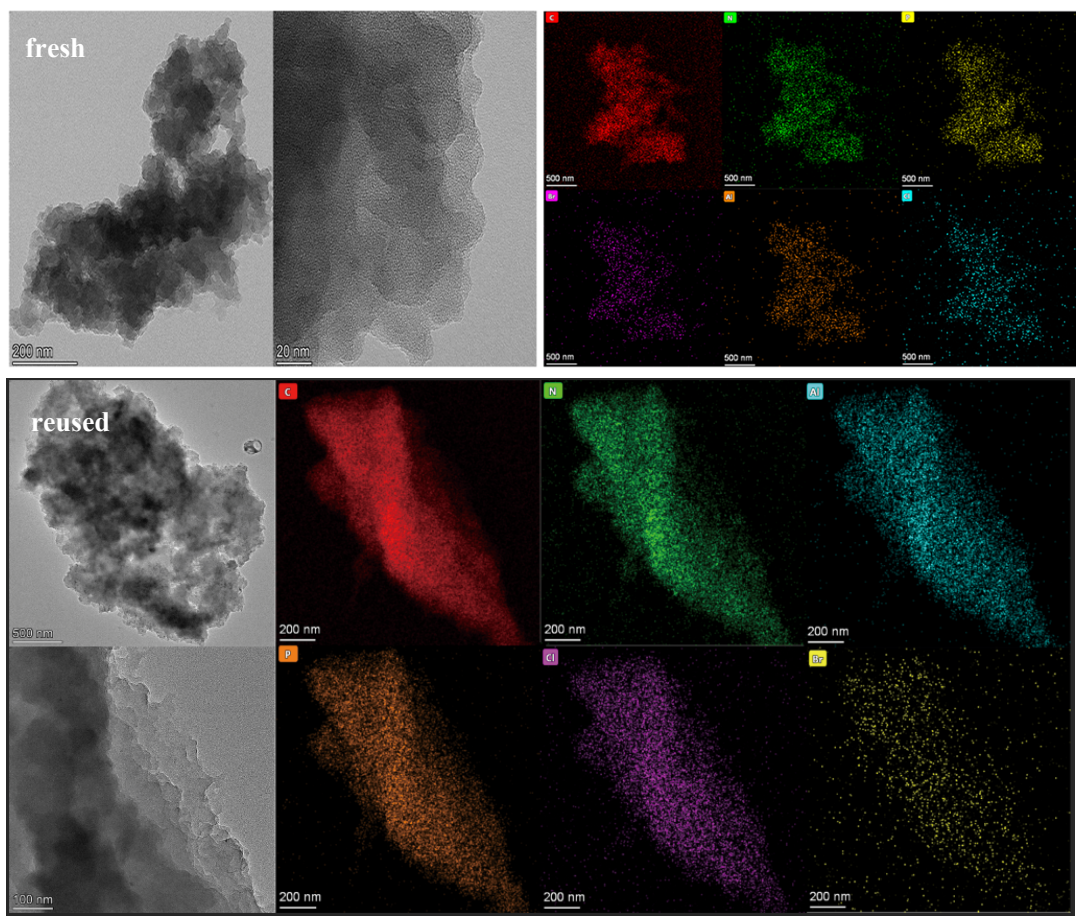

**Figure S3.** TEM and elemental mapping images of AlPor-QP@POP.

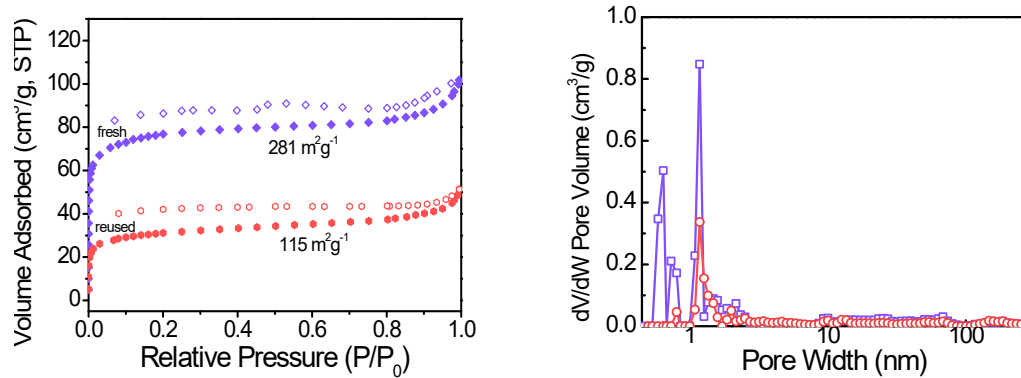

**Figure S4.** N<sub>2</sub> adsorption-desorption isotherms and pore size distributions of **AIPor-QP@POP**

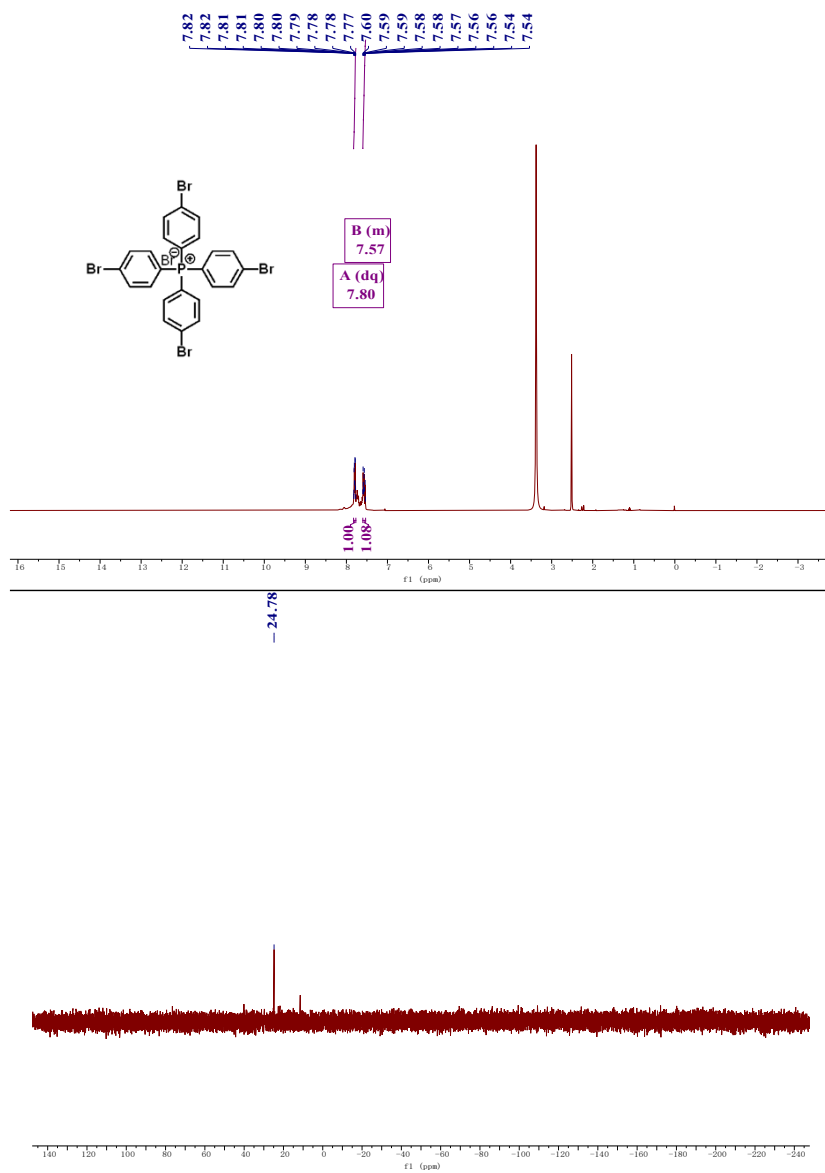

**Figure S5.**  $^1\text{H}$  NMR and  $^{31}\text{P}$  NMR spectra of the as-prepared monomer QP.



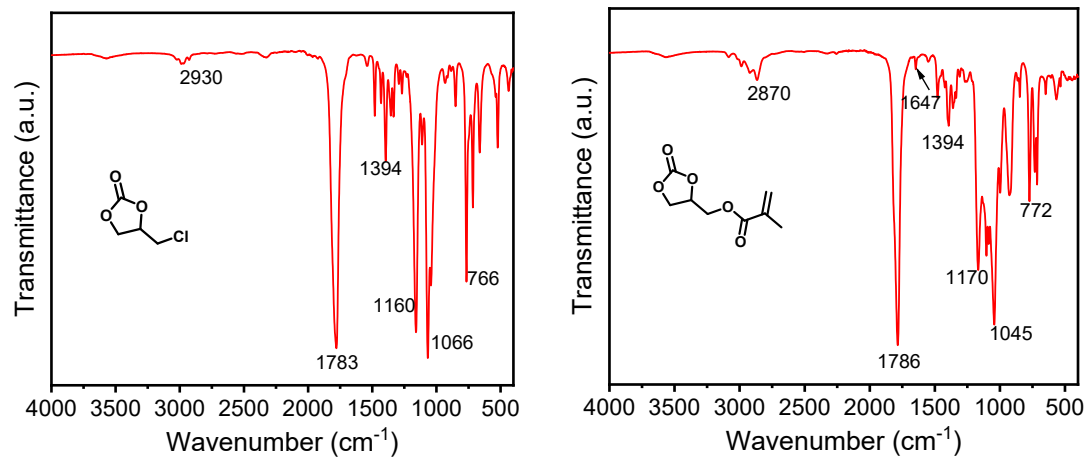

**Figure S6.** FT-IR spectra of typical cyclic carbonates.

# 4. NMR spectra

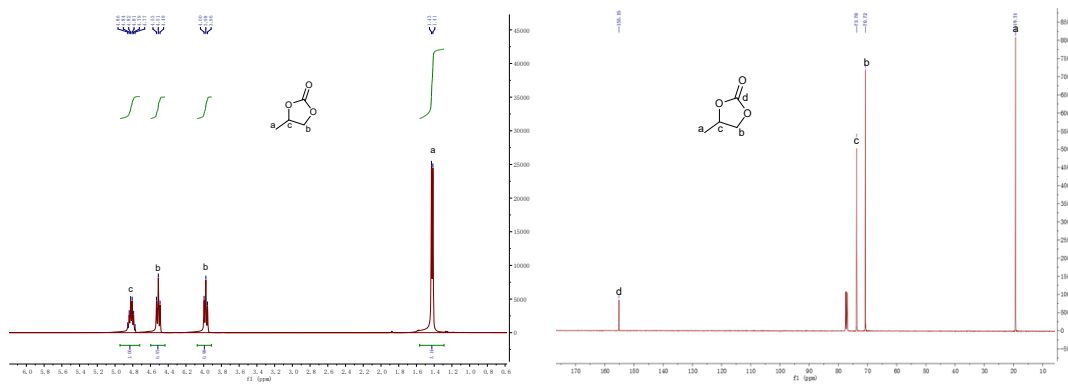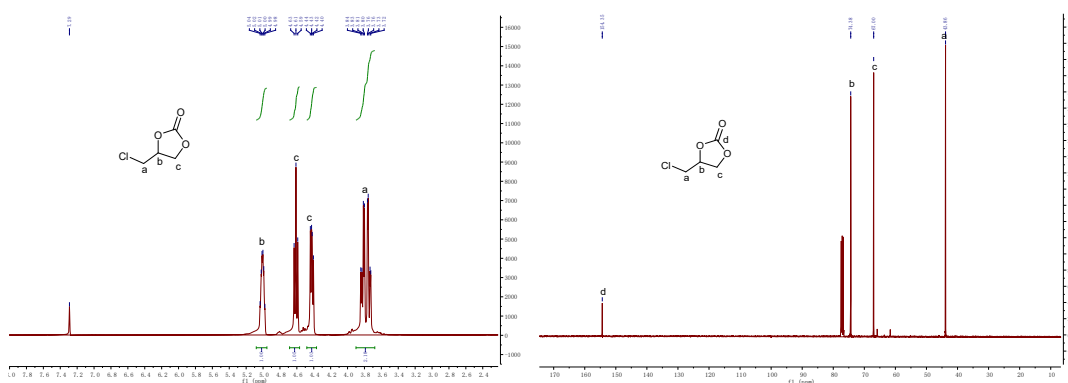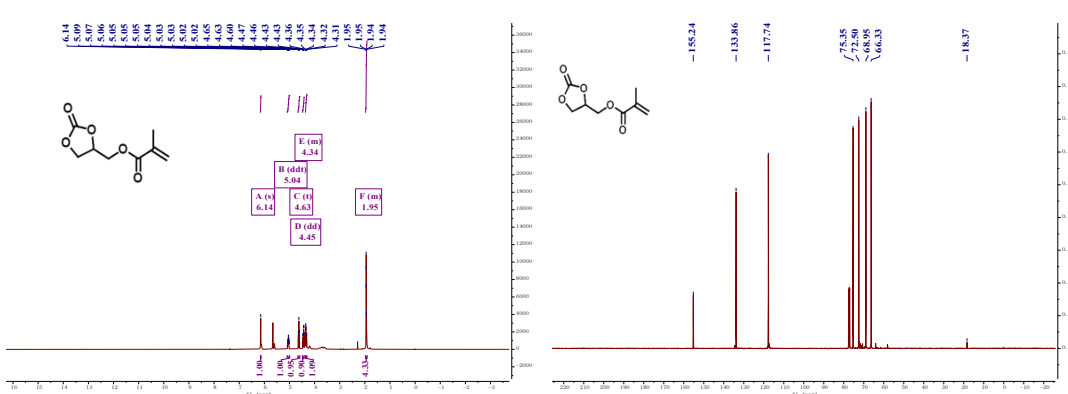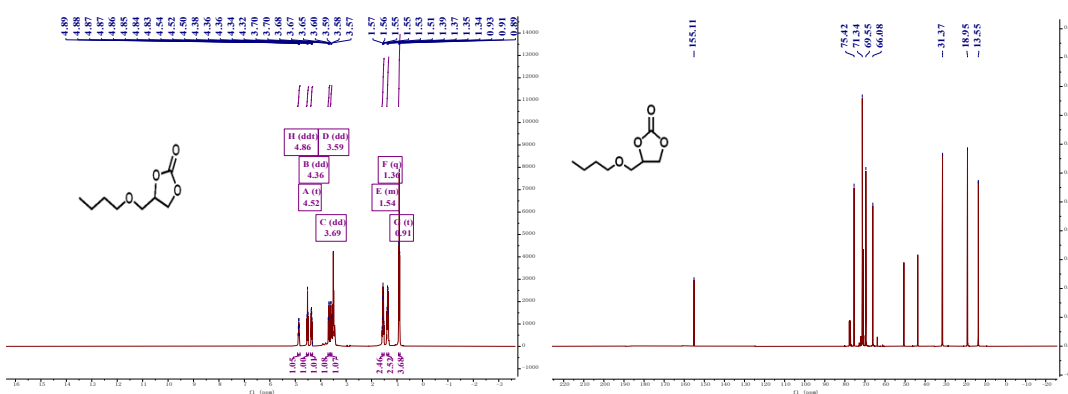

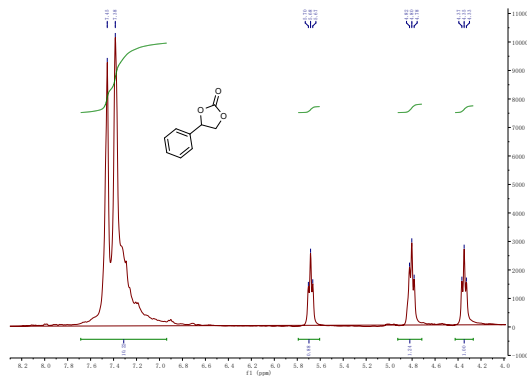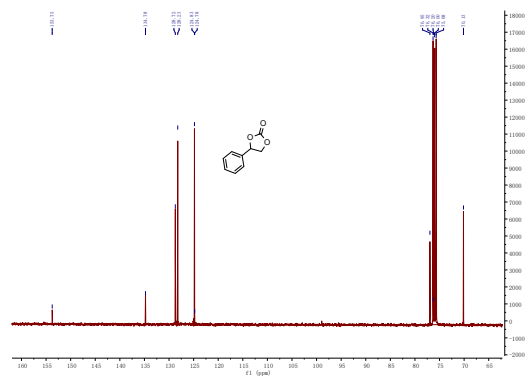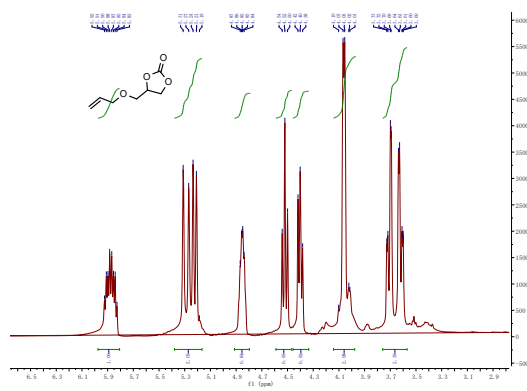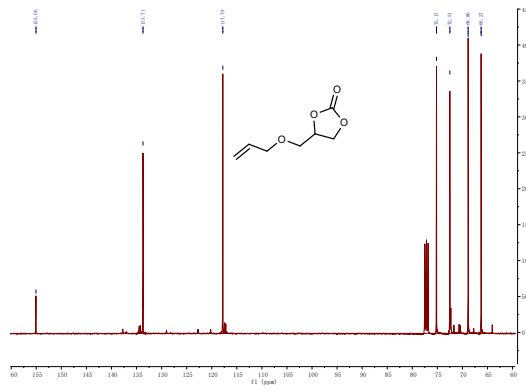

Supplement: d3dt03627h1.pdf [file d3dt03627h1.pdf]
